# Supplementary material for: Complexation between a triptycene-derived oxacalixarene and π-extended viologens: linker-length-dependent orientation of the macrocycles in pseudo[3]rotaxanes
Source: Royal Society of Chemistry journal article supplement (doi:10.1039/c6ob02093c), 2016-01-01
Supplement: c6ob02093c1.pdf [file c6ob02093c1.pdf]

## Electronic Supplementary Information

### Complexation between triptycene-derived oxacalixarene and $\pi$ -extended viologens: linker-length-dependent orientations of macrocycles in pseudo[3]rotaxanes in the solid state

Han-Xiao Wang,<sup>a,b</sup> Shu-Zhen Hu,<sup>a</sup> Qiang Shi<sup>a,b</sup> and Chuan-Feng Chen<sup>\*a,b</sup>

<sup>a</sup>Beijing National Laboratory for Molecular Sciences, CAS Key Laboratory of Molecular Recognition and Function, Institute of Chemistry, Chinese Academy of Sciences, Beijing 100190, China. <sup>b</sup>University of Chinese Academy of Sciences, Beijing 100049, China.

E-mail: cchen@iccas.ac.cn

### Contents

1. Copies of <sup>1</sup>H NMR and <sup>13</sup>C NMR spectra of new compounds
2. <sup>1</sup>H NMR studies on complexation between host H and guests G1-G4
3. Determination of the stoichiometries and association constants
4. Crystal structures
5. Cartesian Coordinates of Computed Structures
6. References

# 1. Copies of $^1\text{H}$ NMR and $^{13}\text{C}$ NMR spectra of new compounds

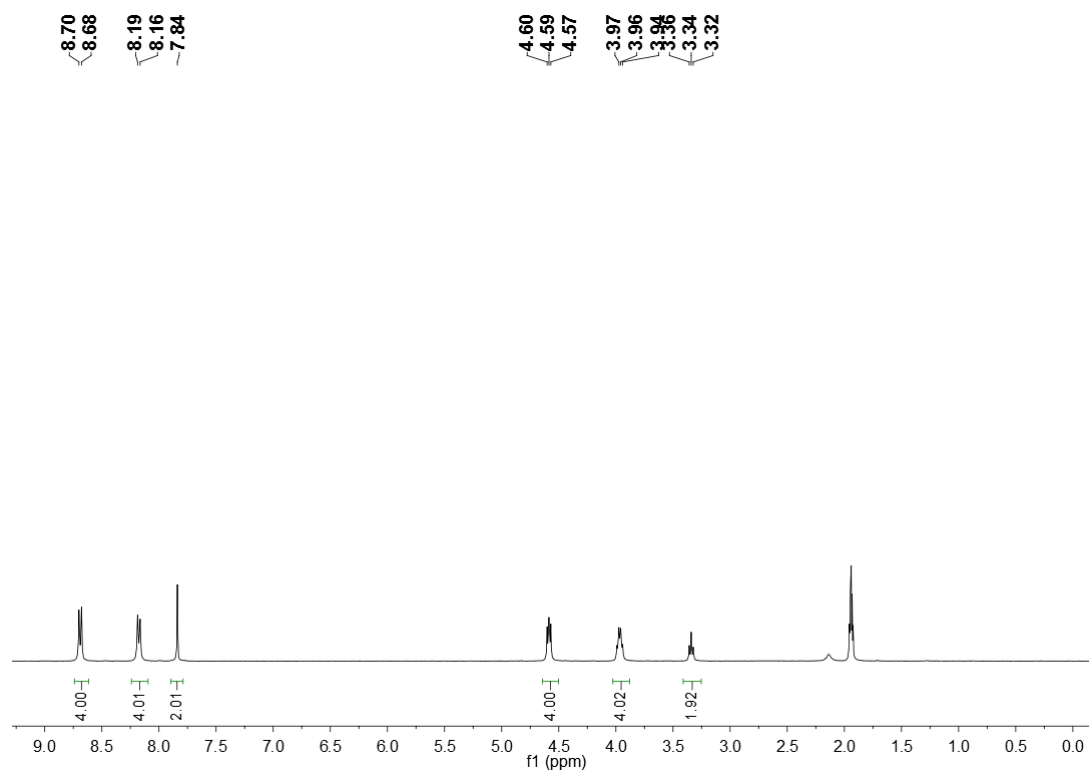

Fig. S1.  $^1\text{H}$  NMR spectrum (300 MHz,  $\text{CD}_3\text{CN}$ ) of G2.

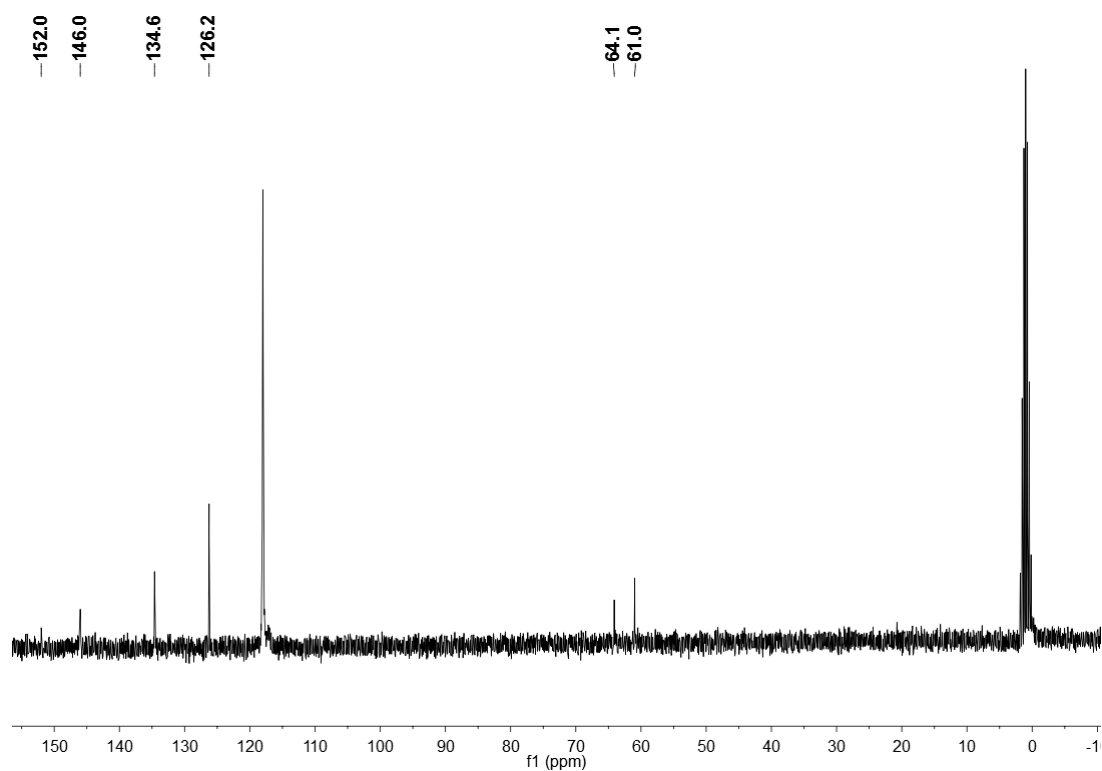

Fig. S2.  $^{13}\text{C}$  NMR spectrum (75 MHz,  $\text{CD}_3\text{CN}$ ) of G2.

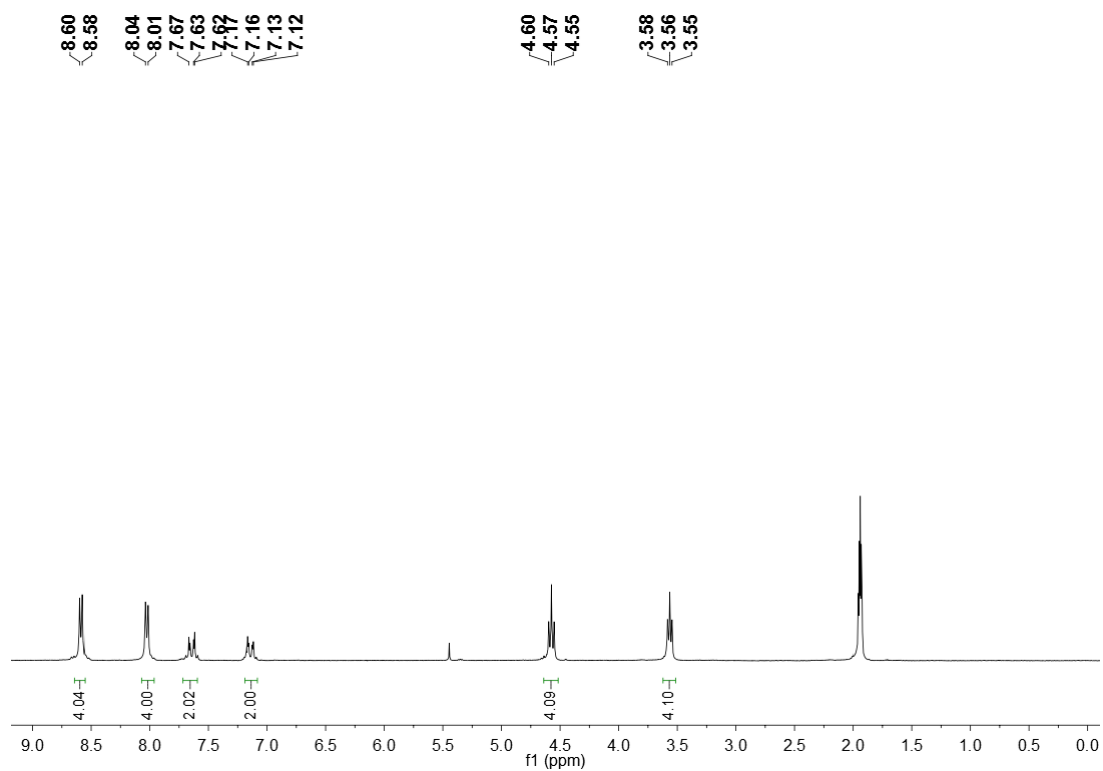

**Fig. S3.**  $^1\text{H}$  NMR spectrum (300 MHz,  $\text{CD}_3\text{CN}$ ) of **G4**.

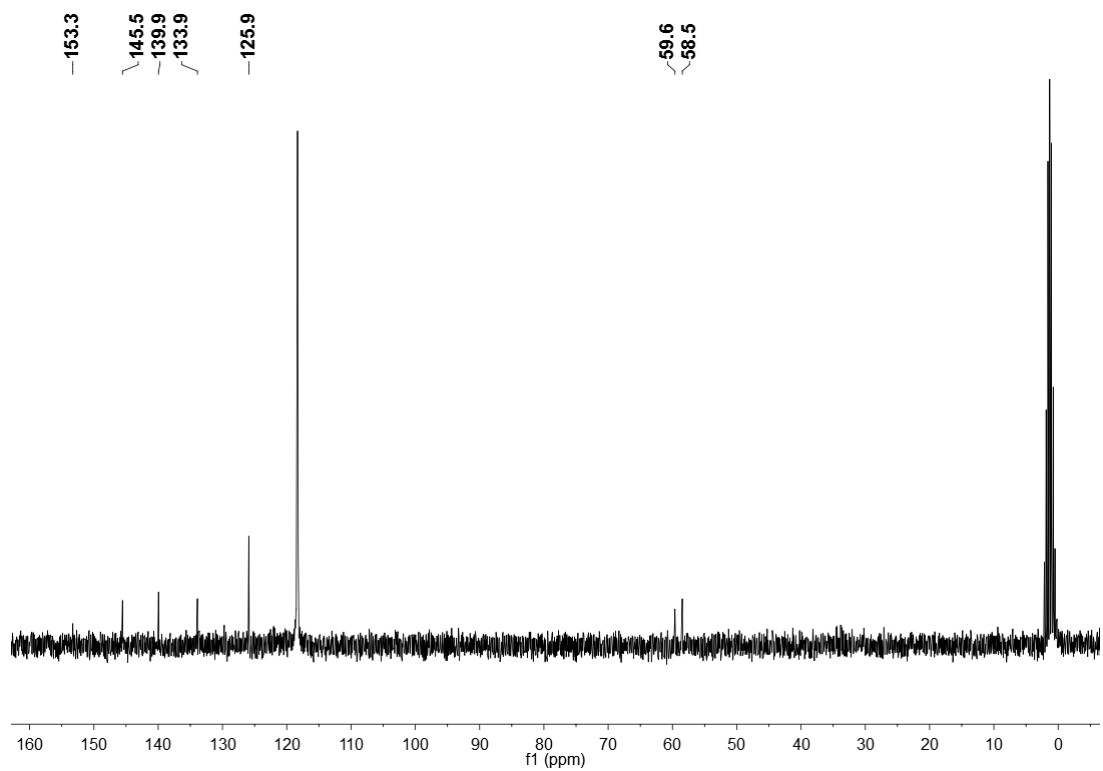

**Fig. S4.**  $^{13}\text{C}$  NMR spectrum (75 MHz,  $\text{CD}_3\text{CN}$ ) of **G4**.

## 2. $^1\text{H}$ NMR studies on complexation between the host **H** and the guests **G1-G4**

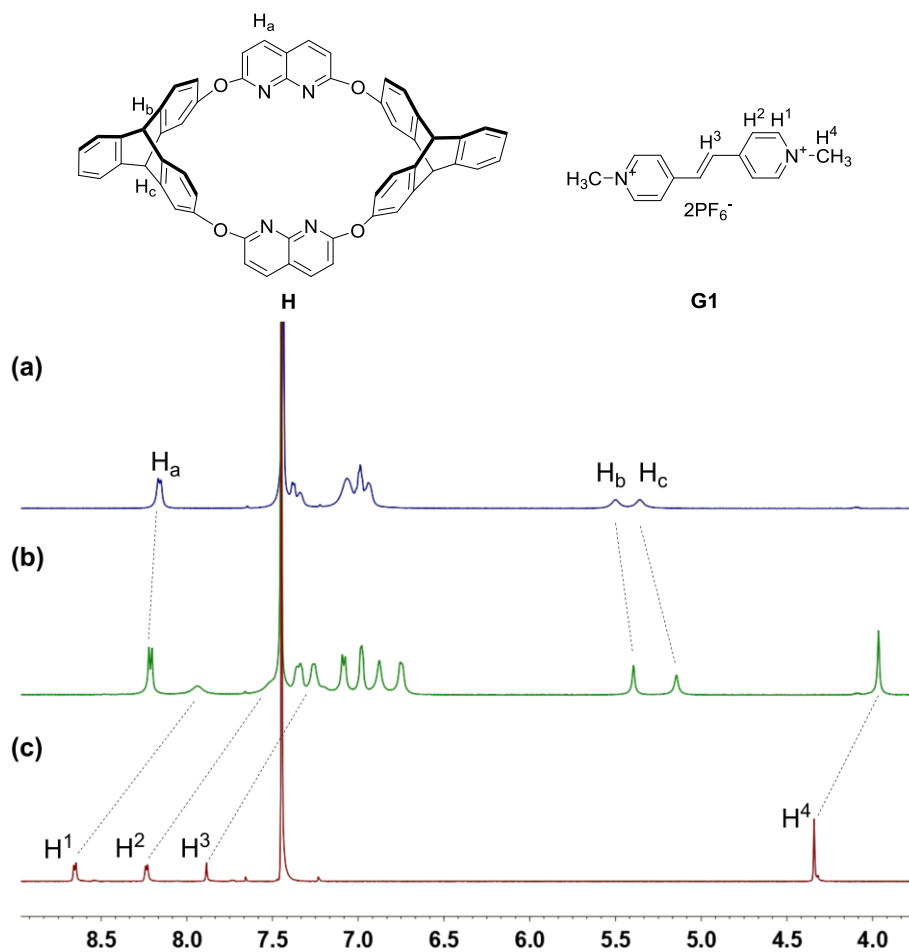

**Fig. S5.** Partial  $^1\text{H}$  NMR spectra (500 MHz,  $\text{CDCl}_3/\text{CD}_3\text{CN}$ , 2:1 v/v, 298K) of (a) free host **H**, (b) **H** and 0.5 equiv. of **G1**, (c) free guest **G1**.  $[\text{H}]_0 = 3.0$  mM.

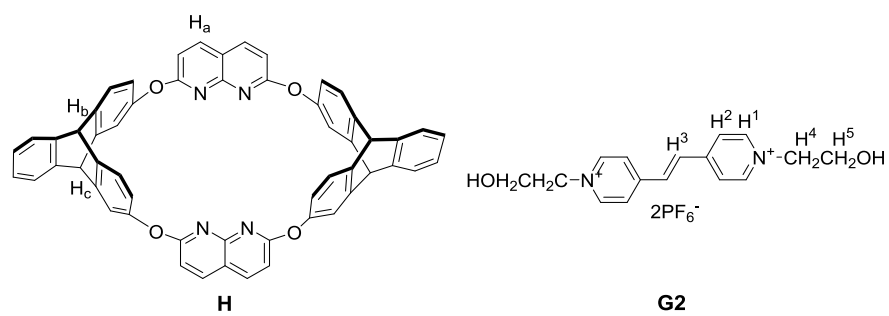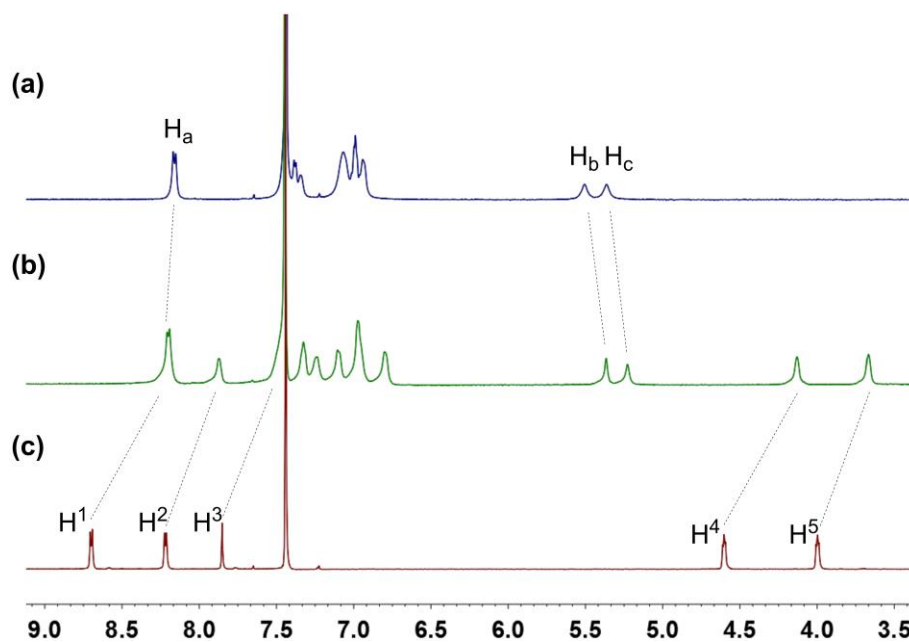

**Fig. S6.** Partial  $^1\text{H}$  NMR spectra (500 MHz,  $\text{CDCl}_3/\text{CD}_3\text{CN}$ , 2:1 v/v, 298K) of (a) free host **H**, (b) **H** and 0.5 equiv. of **G2**, (c) free guest **G2**.  $[\text{H}]_0 = 3.0$  mM.

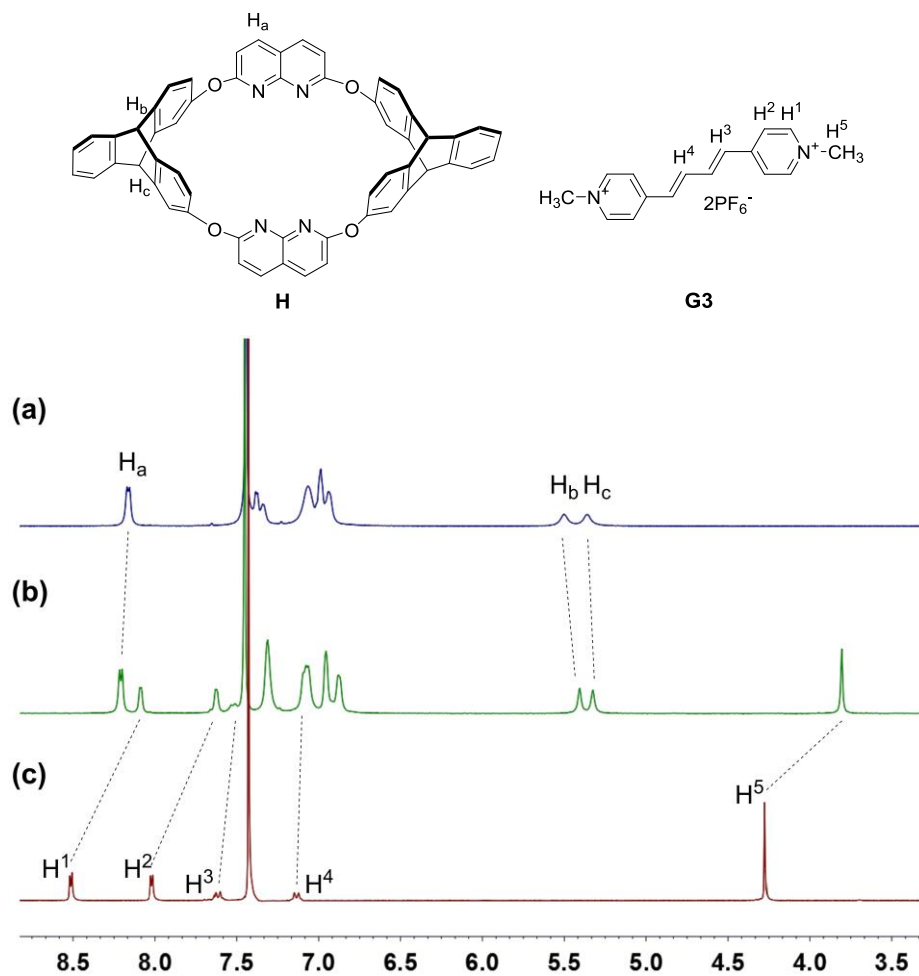

**Fig. S7.** Partial  $^1\text{H}$  NMR spectra (500 MHz,  $\text{CDCl}_3/\text{CD}_3\text{CN}$ , 2:1 v/v, 298K) of (a) free host **H**, (b) **H** and 0.5 equiv. of **G3**, (c) free guest **G3**.  $[\text{H}]_0 = 3.0$  mM.

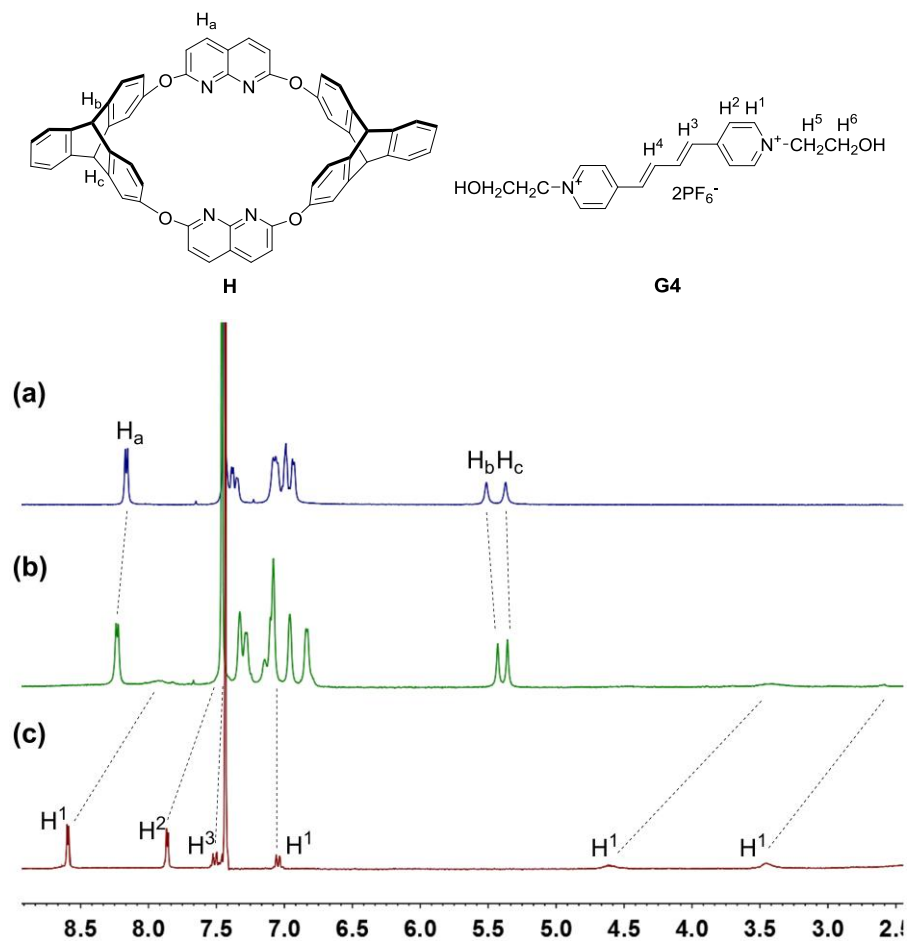

**Fig. S8.** Partial <sup>1</sup>H NMR spectra (500 MHz, CDCl<sub>3</sub>/CD<sub>3</sub>CN, 2:1 v/v, 298K) of (a) free host **H**, (b) **H** and 0.5 equiv. of **G4**, (c) free guest **G4**. [**H**]<sub>0</sub> = 3.0 mM.

### 3. Determination of the stoichiometries and the association constants

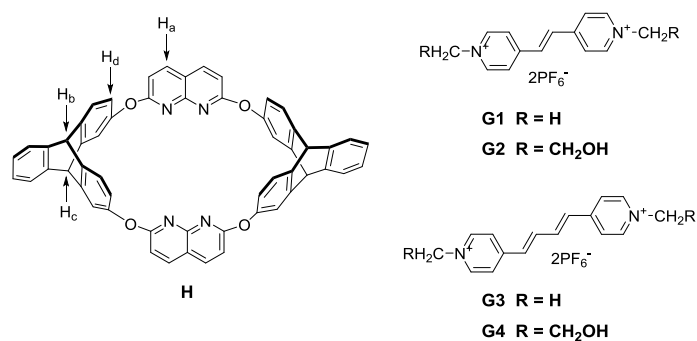

To determine the stoichiometries and association constants between **H** and **G1-G4**, <sup>1</sup>H NMR titrations were done. By a nonlinear curve-fitting method with a Matlab program, the association constants between the guests and the host were calculated and displayed in the manuscript. By a mole ratio plot, each stoichiometry was determined.

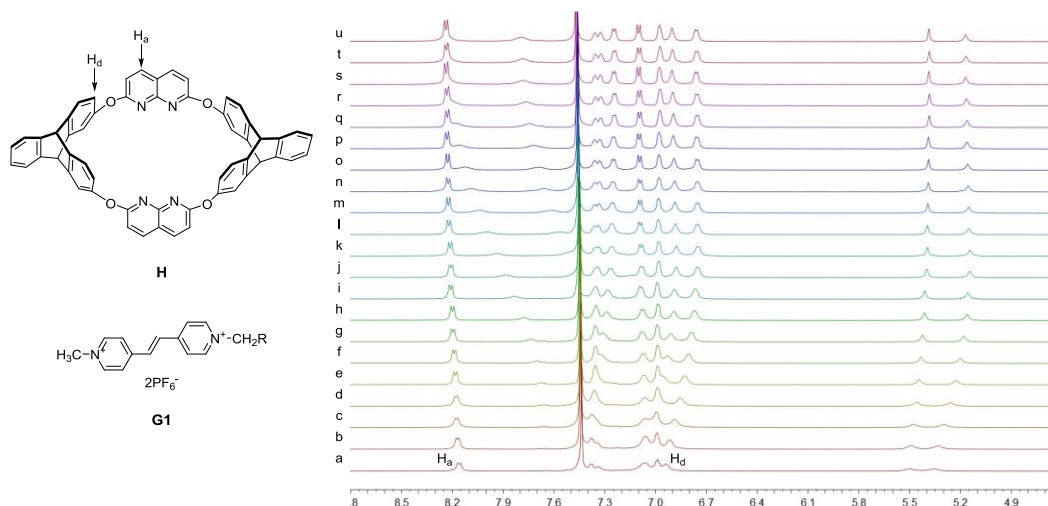

**Fig. S9.** <sup>1</sup>H NMR spectra (500 MHz, CDCl<sub>3</sub>/CD<sub>3</sub>CN, 2:1 v/v, 298K) of **H** at a concentration of 3.00 mM with different concentrations of **G1**: (a) 0.00 mM; (b) 0.18 mM; (c) 0.37 mM; (d) 0.55 mM; (e) 0.73 mM; (f) 0.92 mM; (g) 1.10 mM; (h) 1.28 mM; (i) 1.46 mM; (j) 1.65 mM; (k) 1.83 mM; (l) 2.01 mM; (m) 2.20 mM; (n) 2.38 mM; (o) 2.56 mM; (p) 2.74 mM; (q) 2.93 mM; (r) 3.11 mM; (s) 3.29 mM; (t) 3.47 mM; (u) 3.66 mM.

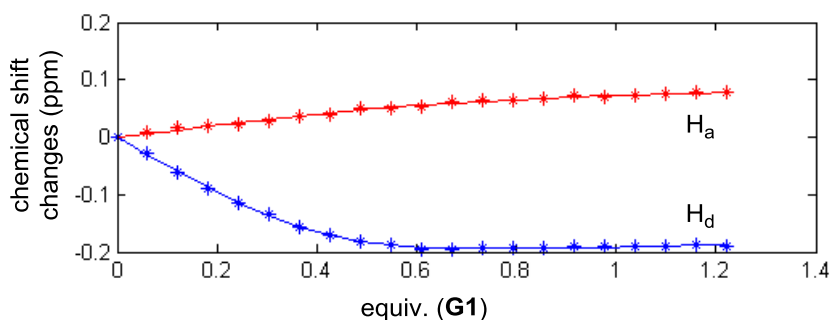

**Fig. S10.** Plot of chemical shift changes of **H** observed upon the titration of **G1**.



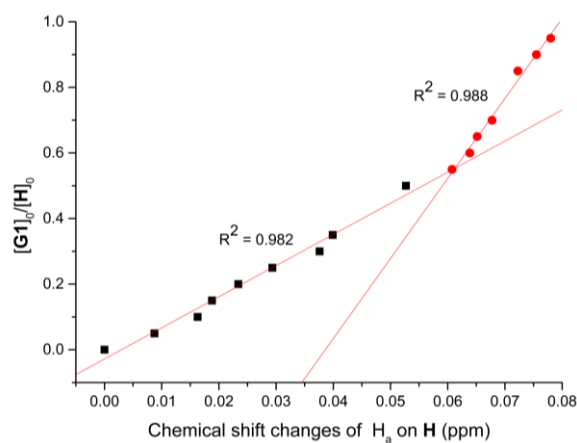

**Fig. S11.** Mole ratio plot for the complexation between **H** and **G1**, indicating a 2:1 stoichiometry.

m

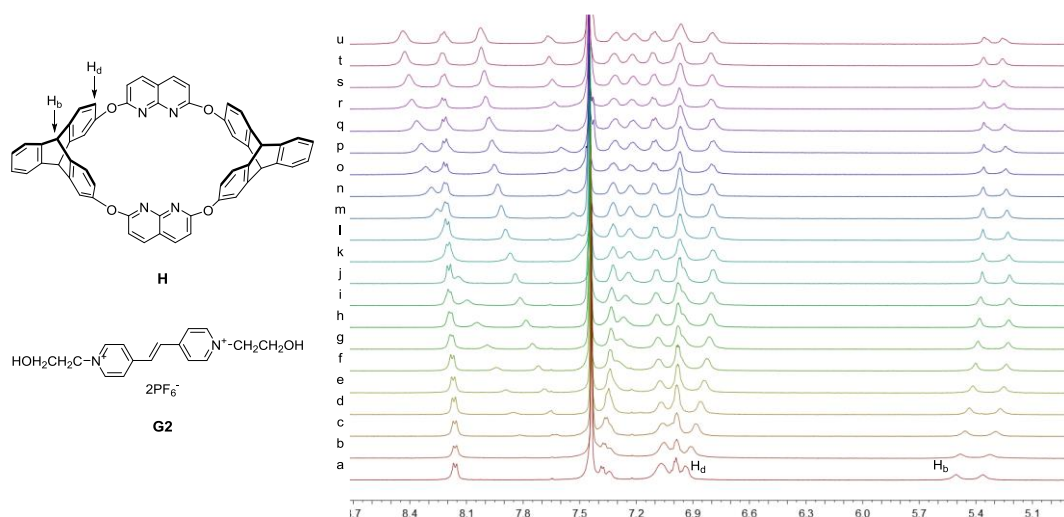

**Fig. S12.**  $^1\text{H}$  NMR spectra (500 MHz,  $\text{CDCl}_3/\text{CD}_3\text{CN}$ , 2:1 v/v, 298K) of **H** at a concentration of 3.00 mM with different concentrations of **G2**: (a) 0.00 mM; (b) 0.22 mM; (c) 0.44 mM; (d) 0.67 mM; (e) 0.89 mM; (f) 1.11 mM; (g) 1.33 mM; (h) 1.55 mM; (i) 1.78 mM; (j) 2.00 mM; (k) 2.22 mM; (l) 2.44 mM; (m) 2.66 mM; (n) 2.89 mM; (o) 3.11 mM; (p) 3.33 mM; (q) 3.55 mM; (r) 3.77 mM; (s) 4.00 mM; (t) 4.22 mM; (u) 4.44 mM.

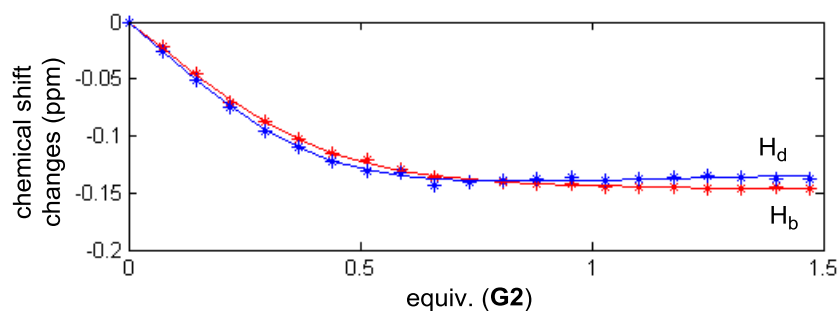

**Fig. S13.** Plot of chemical shift changes of **H** observed upon the titration of **G2**.

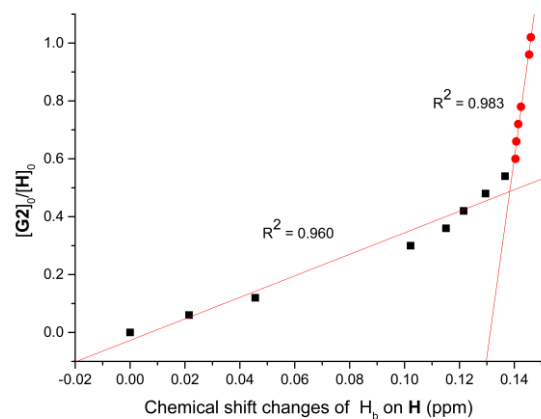

**Fig. S14.** Mole ratio plot for the complexation between **H** and **G2**, indicating a 2:1 stoichiometry.

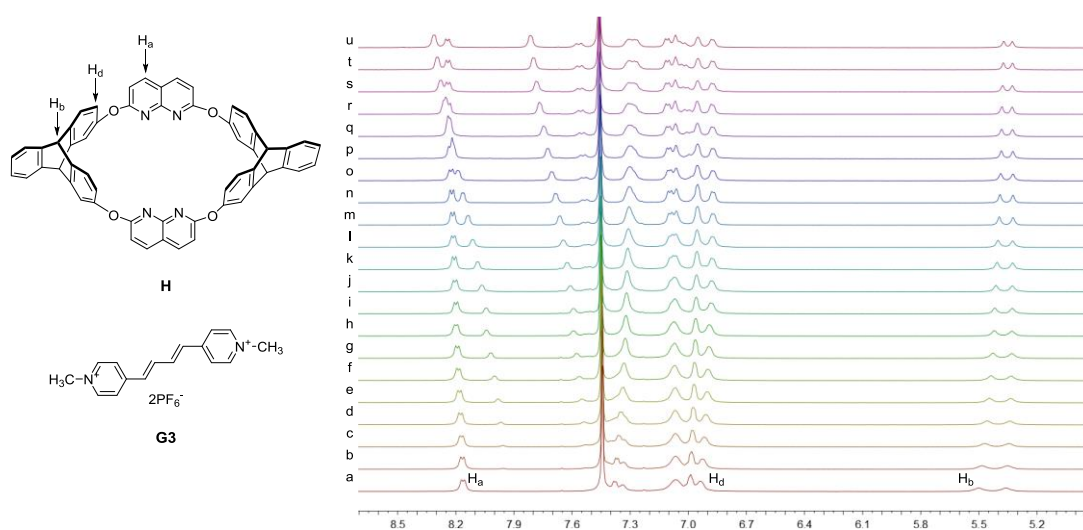

**Fig. S15.**  $^1\text{H}$  NMR spectra (500 MHz,  $\text{CDCl}_3/\text{CD}_3\text{CN}$ , 2:1 v/v, 298K) of **H** at a concentration of 3.00 mM with different concentrations of **G3**: (a) 0.00 mM; (b) 0.12 mM; (c) 0.24 mM; (d) 0.36 mM; (e) 0.48 mM; (f) 0.60 mM; (g) 0.72 mM; (h) 0.84 mM; (i) 0.96 mM; (j) 1.08 mM; (k) 1.20 mM; (l) 1.32 mM; (m) 1.44 mM; (n) 1.56 mM; (o) 1.68 mM; (p) 1.80 mM; (q) 1.92 mM; (r) 2.04 mM; (s) 2.16 mM; (t) 2.28 mM; (u) 2.40 mM.

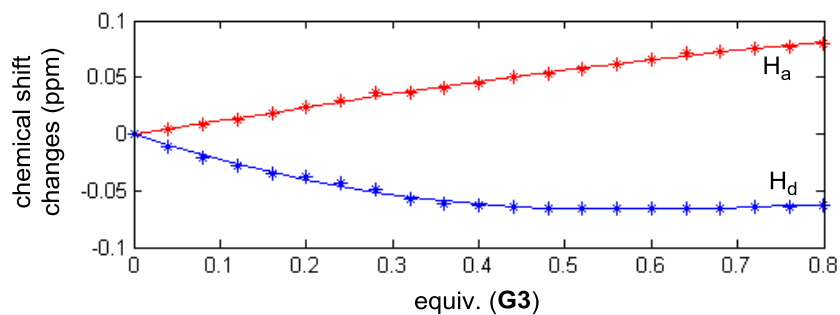

**Fig. S16.** Plot of chemical shift changes of **H** observed upon the titration of **G3**.

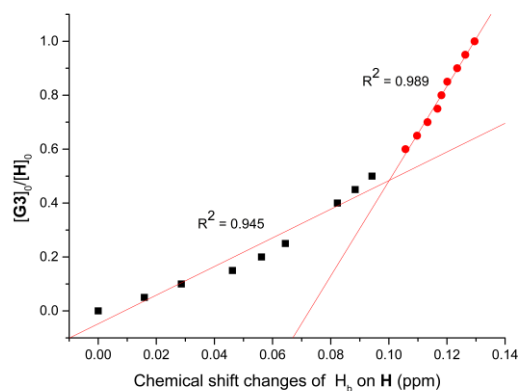

**Fig. S17.** Mole ratio plot for the complexation between **H** and **G3**, indicating a 2:1 stoichiometry.

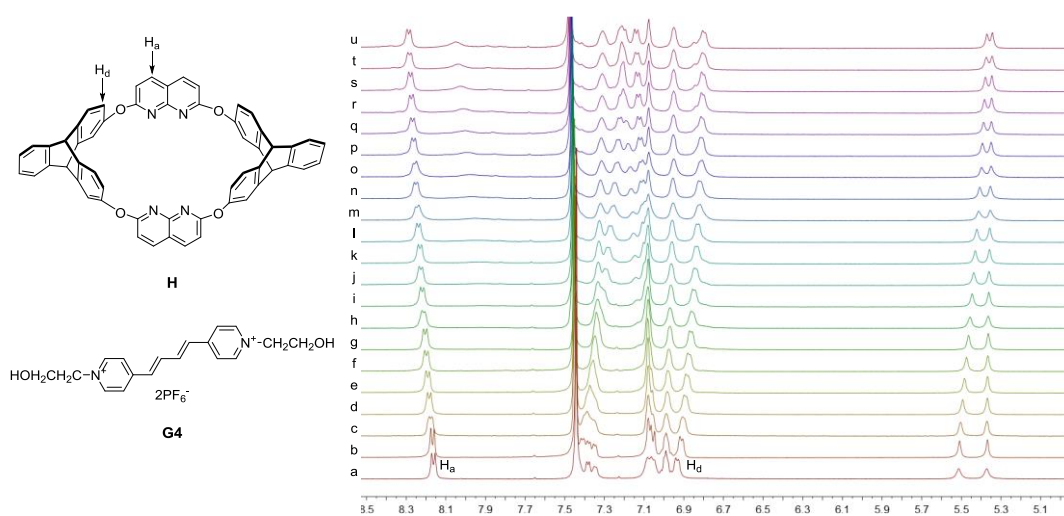

**Fig. S18.**  $^1\text{H}$  NMR spectra (500 MHz,  $\text{CDCl}_3/\text{CD}_3\text{CN}$ , 2:1 v/v, 298K) of **H** at a concentration of 3.00 mM with different concentrations of **G4**: (a) 0.00 mM; (b) 0.15 mM; (c) 0.30 mM; (d) 0.45 mM; (e) 0.60 mM; (f) 0.75 mM; (g) 0.90 mM; (h) 1.05 mM; (i) 1.20 mM; (j) 1.35 mM; (k) 1.50 mM; (l) 1.65 mM; (m) 1.80 mM; (n) 1.95 mM; (o) 2.10 mM; (p) 2.25 mM; (q) 2.40 mM; (r) 2.55 mM; (s) 2.70 mM; (t) 2.85 mM; (u) 3.00 mM.

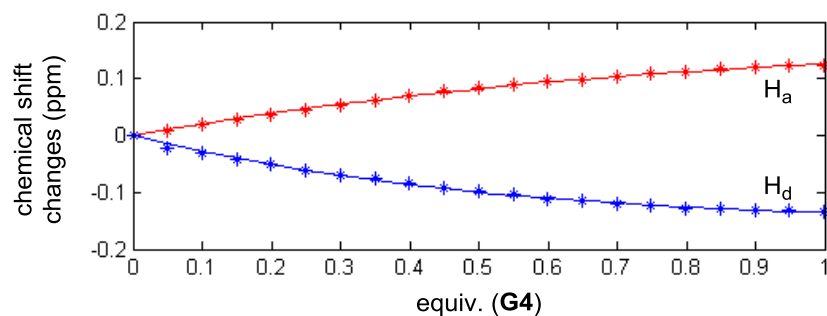

**Fig. S19.** Plot of chemical shift changes of **H** observed upon the titration of **G4**.

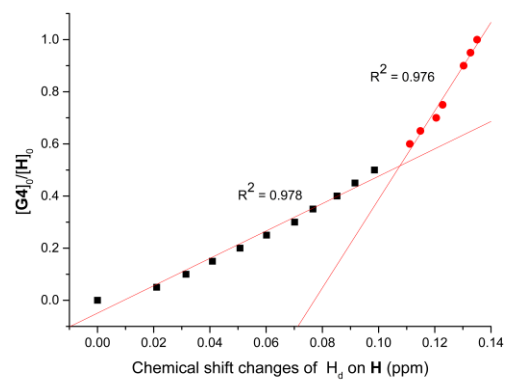

**Fig. S20.** Mole ratio plot for the complexation between **H** and **G4**, indicating a 2:1 stoichiometry.

#### 4. Crystal structures

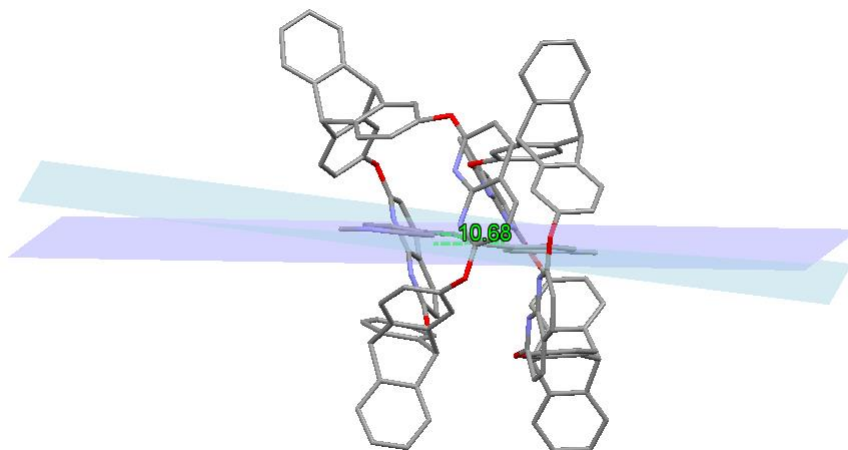

**Fig. S21.** The dihedral angle between the planes of the two pyridinium rings in complex  $\text{H}_2\cdot\text{G1}$ .

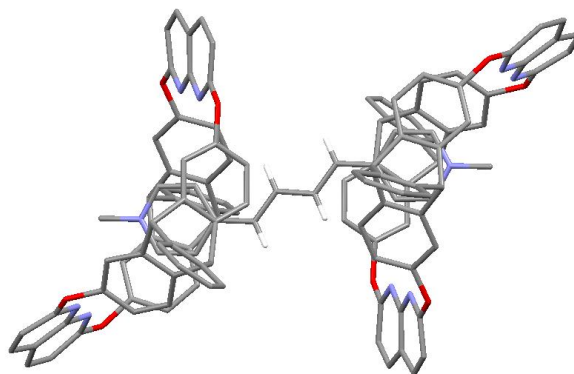

**Fig. S22.** The crystal structure of complex  $\text{H}_2\cdot\text{G3}$  showing that the protons on the two double bonds are nearly out of the shielding regions of the host molecules.

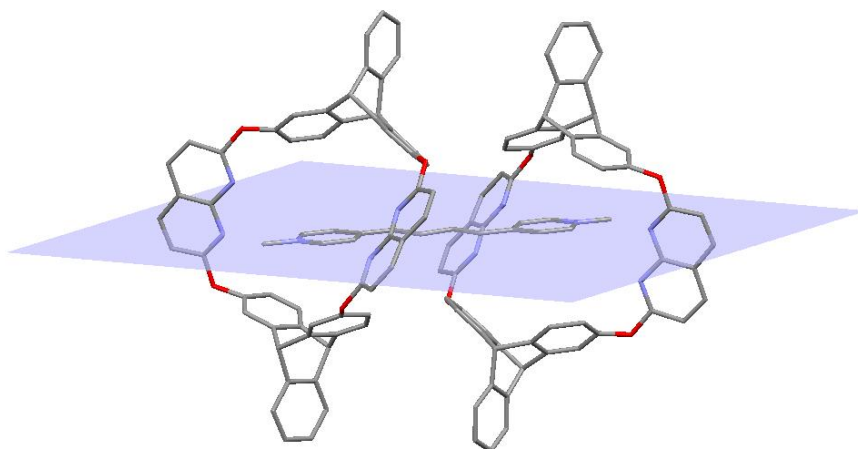

**Fig. S23.** The plane of the two pyridinium rings in complex  $\text{H}_2\cdot\text{G3}$ .

## 5. Cartesian Coordinates of Computed Structures<sup>1</sup>

All DFT calculations were carried out with Gaussian 09 program using B3LYP hybrid functional. Geometries were fully optimized employing the 3-21G\* basis set on all atoms.

### (H, H)-H<sub>2</sub>-G1

|   |         |         |         |
|---|---------|---------|---------|
| O | 11.8498 | 10.1812 | 10.4167 |
| O | 11.3162 | 19.1177 | 12.0594 |
| O | 6.0655  | 9.5525  | 6.6174  |
| O | 6.6572  | 18.0963 | 7.0104  |
| N | 9.9069  | 9.983   | 9.1475  |
| N | 7.9837  | 9.7814  | 7.8872  |
| N | 8.2061  | 18.4176 | 8.7404  |
| N | 9.7677  | 18.7496 | 10.4095 |
| C | 11.2866 | 11.1465 | 11.2703 |
| C | 12.1135 | 12.297  | 11.447  |
| H | 12.8803 | 12.4505 | 10.9066 |
| C | 11.7417 | 13.1644 | 12.4362 |
| C | 10.5898 | 12.9849 | 13.2204 |
| C | 9.7793  | 11.8962 | 12.9528 |
| H | 8.9665  | 11.7905 | 13.4344 |
| C | 10.1327 | 10.9491 | 11.9887 |
| H | 9.5846  | 10.1873 | 11.8319 |
| C | 12.589  | 14.3688 | 12.8937 |
| H | 13.3995 | 14.5163 | 12.3283 |
| C | 12.9266 | 14.0178 | 14.3483 |
| C | 14.1576 | 13.8962 | 14.9313 |
| H | 14.9404 | 14.0318 | 14.4082 |
| C | 14.278  | 13.5791 | 16.2723 |
| H | 15.1401 | 13.5373 | 16.6688 |
| C | 13.1961 | 13.3279 | 17.0168 |
| H | 13.3065 | 13.0707 | 17.9233 |
| C | 11.8946 | 13.4376 | 16.487  |
| H | 11.1314 | 13.2741 | 17.0276 |
| C | 11.7616 | 13.8005 | 15.1323 |
| C | 10.4959 | 13.97   | 14.3564 |
| H | 9.6838  | 13.8204 | 14.9208 |
| C | 10.5452 | 15.3777 | 13.7872 |
| C | 9.6807  | 16.4465 | 14.0324 |
| H | 8.9395  | 16.3348 | 14.6159 |
| C | 9.904   | 17.6748 | 13.4195 |
| H | 9.2985  | 18.3947 | 13.5504 |
| C | 11.0309 | 17.8323 | 12.6081 |
| C | 11.8846 | 16.8214 | 12.3639 |
| H | 12.6211 | 16.955  | 11.778  |
| C | 11.6926 | 15.5731 | 12.9677 |
| C | 10.7214 | 19.4794 | 10.9061 |
| C | 11.2343 | 20.6957 | 10.3453 |
| H | 11.9249 | 21.1882 | 10.7718 |
| C | 10.6928 | 21.1005 | 9.1915  |

|   |         |         |         |
|---|---------|---------|---------|
| H | 11.0165 | 21.8921 | 8.7782  |
| C | 9.6489  | 20.3711 | 8.5764  |
| C | 9.214   | 19.2022 | 9.2271  |
| C | 9.0611  | 20.7097 | 7.3487  |
| H | 9.3761  | 21.4654 | 6.8655  |
| C | 8.0394  | 19.956  | 6.8426  |
| H | 7.6131  | 20.1793 | 6.0239  |
| C | 7.6407  | 18.8094 | 7.6093  |
| C | 5.9105  | 17.0746 | 7.6762  |
| C | 5.4111  | 16.1157 | 6.7771  |
| H | 5.6521  | 16.1295 | 5.8593  |
| C | 4.5564  | 15.1524 | 7.2751  |
| C | 4.2549  | 15.1065 | 8.6139  |
| C | 4.697   | 16.0816 | 9.4599  |
| H | 4.4275  | 16.0756 | 10.3698 |
| C | 5.5587  | 17.1005 | 8.9805  |
| H | 5.8766  | 17.7825 | 9.5605  |
| C | 3.9122  | 13.9859 | 6.4412  |
| H | 4.1338  | 14.0218 | 5.4655  |
| C | 2.428   | 14.1135 | 6.7369  |
| C | 1.3675  | 14.2033 | 5.783   |
| H | 1.5686  | 14.2411 | 4.8558  |
| C | 0.0655  | 14.2372 | 6.1965  |
| H | -0.6361 | 14.3289 | 5.5626  |
| C | -0.217  | 14.1335 | 7.5265  |
| H | -1.1242 | 14.1275 | 7.8043  |
| C | 0.7832  | 14.0378 | 8.486   |
| H | 0.5524  | 13.9819 | 9.4067  |
| C | 2.0954  | 14.0218 | 8.1102  |
| C | 3.3112  | 13.9105 | 8.9792  |
| H | 3.0892  | 13.8743 | 9.9544  |
| C | 4.1055  | 12.6876 | 8.5049  |
| C | 4.4626  | 11.6071 | 9.2484  |
| H | 4.2368  | 11.5712 | 10.1702 |
| C | 5.1673  | 10.5383 | 8.6517  |
| H | 5.4332  | 9.7826  | 9.1613  |
| C | 5.4598  | 10.632  | 7.284   |
| C | 5.0671  | 11.7227 | 6.5267  |
| H | 5.2503  | 11.7506 | 5.5949  |
| C | 4.4167  | 12.7516 | 7.1302  |
| C | 7.3235  | 9.1285  | 6.9918  |
| C | 7.7262  | 7.9764  | 6.2936  |
| H | 7.1545  | 7.5393  | 5.6732  |
| C | 9.0077  | 7.5134  | 6.5599  |
| H | 9.3612  | 6.7696  | 6.0832  |
| C | 9.773   | 8.1614  | 7.5467  |
| C | 9.2324  | 9.3     | 8.1858  |
| C | 11.0876 | 7.7467  | 7.9298  |
| H | 11.4933 | 7.0069  | 7.4941  |
| C | 11.7547 | 8.3947  | 8.902   |
| H | 12.618  | 8.1216  | 9.1936  |

|   |         |         |         |
|---|---------|---------|---------|
| C | 11.064  | 9.5453  | 9.4785  |
| N | 7.5288  | 14.7875 | 11.2406 |
| N | 13.5651 | 11.9022 | 4.7759  |
| C | 6.6636  | 15.2701 | 12.3715 |
| H | 5.7733  | 14.8673 | 12.2959 |
| H | 6.5848  | 16.2451 | 12.3283 |
| H | 7.0686  | 15.0108 | 13.2266 |
| C | 8.5224  | 15.5472 | 10.7486 |
| H | 8.6382  | 16.4266 | 11.0847 |
| C | 9.3526  | 15.1026 | 9.8006  |
| H | 10.0729 | 15.6389 | 9.4904  |
| C | 9.1269  | 13.7825 | 9.2611  |
| C | 8.0527  | 13.0627 | 9.7332  |
| H | 7.8591  | 12.2053 | 9.3744  |
| C | 7.2538  | 13.5971 | 10.7421 |
| H | 6.512   | 13.1046 | 11.0685 |
| C | 9.9738  | 13.1923 | 8.1955  |
| H | 9.6729  | 12.3967 | 7.7693  |
| C | 11.1106 | 13.7068 | 7.807   |
| H | 11.4096 | 14.5223 | 8.1928  |
| C | 12.6321 | 11.1265 | 5.425   |
| H | 12.529  | 10.2153 | 5.1768  |
| C | 11.8467 | 11.6589 | 6.4312  |
| H | 11.234  | 11.1086 | 6.906   |
| C | 11.9652 | 13.0148 | 6.7415  |
| C | 12.8891 | 13.7466 | 6.0616  |
| H | 12.9714 | 14.6719 | 6.2613  |
| C | 13.6989 | 13.2103 | 5.1121  |
| H | 14.3563 | 13.7466 | 4.6831  |
| C | 14.4176 | 11.3638 | 3.6958  |
| H | 15.2375 | 10.9909 | 4.0843  |
| H | 14.6508 | 12.0836 | 3.0726  |
| H | 13.9338 | 10.6579 | 3.2183  |
| O | 12.6105 | 18.486  | 7.9907  |
| O | 8.6061  | 11.5281 | 4.8086  |
| O | 12.9239 | 6.3529  | 3.2558  |
| O | 14.9129 | 12.1893 | 9.5918  |
| N | 13.4234 | 16.4126 | 8.5338  |
| N | 14.2369 | 14.291  | 9.0428  |
| N | 11.449  | 8.0558  | 3.8029  |
| N | 9.9771  | 9.8005  | 4.2958  |
| C | 12.1961 | 17.958  | 6.7237  |
| C | 13.0927 | 17.9759 | 5.6921  |
| H | 13.9721 | 18.3089 | 5.8323  |
| C | 12.7257 | 17.5093 | 4.4565  |
| H | 13.3391 | 17.5293 | 3.7309  |
| C | 11.4546 | 17.0148 | 4.2885  |
| C | 10.5509 | 17.0148 | 5.3295  |
| C | 10.9049 | 17.4794 | 6.5901  |
| H | 10.2961 | 17.4674 | 7.3188  |
| C | 9.1638  | 16.4565 | 4.9502  |



|   |          |          |         |
|---|----------|----------|---------|
| H | 8. 5167  | 16. 4804 | 5. 7136 |
| C | 8. 6653  | 17. 266  | 3. 726  |
| C | 7. 513   | 17. 9859 | 3. 6321 |
| H | 6. 907   | 18. 0537 | 4. 3594 |
| C | 7. 2615  | 18. 6319 | 2. 3874 |
| H | 6. 46    | 19. 1344 | 2. 2822 |
| C | 8. 0986  | 18. 5522 | 1. 3812 |
| H | 7. 8804  | 18. 9749 | 0. 5584 |
| C | 9. 2908  | 17. 8662 | 1. 4942 |
| H | 9. 8863  | 17. 8383 | 0. 7553 |
| C | 9. 6209  | 17. 2381 | 2. 6345 |
| C | 10. 8901 | 16. 4126 | 3. 0222 |
| H | 11. 5632 | 16. 3787 | 2. 2822 |
| C | 10. 3783 | 15. 0348 | 3. 3966 |
| C | 9. 4034  | 15. 0507 | 4. 4325 |
| C | 8. 8631  | 13. 8623 | 4. 903  |
| H | 8. 2395  | 13. 8663 | 5. 6192 |
| C | 9. 2442  | 12. 6798 | 4. 3171 |
| C | 10. 2108 | 12. 618  | 3. 2466 |
| H | 10. 4774 | 11. 7925 | 2. 8595 |
| C | 10. 7239 | 13. 8204 | 2. 8166 |
| H | 11. 3393 | 13. 8204 | 2. 0934 |
| C | 8. 8149  | 10. 3449 | 4. 1725 |
| C | 7. 6998  | 9. 7686  | 3. 4789 |
| H | 6. 8583  | 10. 2073 | 3. 4422 |
| C | 7. 9022  | 8. 5563  | 2. 8676 |
| H | 7. 1938  | 8. 1415  | 2. 3901 |
| C | 9. 1758  | 7. 9142  | 2. 9491 |
| C | 10. 1702 | 8. 5762  | 3. 6645 |
| C | 9. 4895  | 6. 6859  | 2. 3362 |
| H | 8. 8236  | 6. 2093  | 1. 8533 |
| C | 10. 7763 | 6. 1774  | 2. 4414 |
| H | 11. 0367 | 5. 3718  | 2. 0098 |
| C | 11. 668  | 6. 9252  | 3. 2156 |
| C | 13. 9776 | 7. 0887  | 3. 8253 |
| C | 14. 9157 | 7. 6151  | 2. 9782 |
| H | 14. 8023 | 7. 5593  | 2. 0367 |
| C | 16. 0592 | 8. 2432  | 3. 5231 |
| H | 16. 736  | 8. 5822  | 2. 9512 |
| C | 16. 1855 | 8. 3569  | 4. 8857 |
| C | 15. 2368 | 7. 7886  | 5. 7212 |
| C | 14. 1277 | 7. 1704  | 5. 1849 |
| H | 13. 4658 | 6. 8015  | 5. 7595 |
| C | 15. 556  | 7. 9341  | 7. 2108 |
| H | 14. 8586 | 7. 5333  | 7. 807  |
| C | 16. 9716 | 7. 2861  | 7. 3916 |
| C | 17. 3047 | 6. 2552  | 8. 2449 |
| H | 16. 6436 | 5. 8783  | 8. 816  |
| C | 18. 5951 | 5. 7666  | 8. 271  |
| H | 18. 8305 | 5. 0707  | 8. 8753 |
| C | 19. 5641 | 6. 309   | 7. 3997 |

|   |         |         |         |
|---|---------|---------|---------|
| H | 20.4501 | 5.9621  | 7.397   |
| C | 19.2188 | 7.3539  | 6.5429  |
| H | 19.8723 | 7.7228  | 5.9591  |
| C | 17.9185 | 7.8544  | 6.5394  |
| C | 17.3646 | 8.9192  | 5.6678  |
| H | 18.0606 | 9.312   | 5.0662  |
| C | 16.7192 | 9.9899  | 6.5845  |
| C | 17.024  | 11.3379 | 6.6821  |
| H | 17.6491 | 11.7347 | 6.0859  |
| C | 16.4101 | 12.0956 | 7.6581  |
| H | 16.6162 | 13.0188 | 7.7342  |
| C | 15.5019 | 11.5333 | 8.5222  |
| C | 15.1439 | 10.1794 | 8.4197  |
| H | 14.4944 | 9.7965  | 8.9967  |
| C | 15.77   | 9.4217  | 7.4474  |
| C | 15.0389 | 13.5552 | 9.7278  |
| C | 16.0252 | 14.0059 | 10.6423 |
| H | 16.6264 | 13.4116 | 11.0766 |
| C | 16.0462 | 15.3717 | 10.8635 |
| H | 16.67   | 15.7267 | 11.4866 |
| C | 15.1897 | 16.2371 | 10.2053 |
| C | 14.29   | 15.6669 | 9.2713  |
| C | 15.1307 | 17.6868 | 10.3644 |
| H | 15.7082 | 18.1275 | 10.9741 |
| C | 14.2612 | 18.3707 | 9.6568  |
| H | 14.1952 | 19.3139 | 9.7628  |
| C | 13.4303 | 17.7047 | 8.7396  |

**(H, T)-H<sub>2</sub>-G1**

|   |          |          |          |
|---|----------|----------|----------|
| N | -2.40304 | -0.59919 | 3.67004  |
| C | -3.07149 | -0.98849 | 4.95485  |
| H | -4.10247 | -1.25252 | 4.71624  |
| H | -2.53131 | -1.82942 | 5.38805  |
| H | -3.06002 | -0.13206 | 5.62958  |
| C | -2.93543 | 0.41846  | 2.93819  |
| H | -3.79105 | 0.92616  | 3.37643  |
| C | -2.36866 | 0.76075  | 1.72438  |
| H | -2.79986 | 1.58051  | 1.16745  |
| C | -1.23593 | 0.08015  | 1.24168  |
| C | -0.70693 | -0.96556 | 2.03094  |
| H | 0.14504  | -1.55159 | 1.69972  |
| C | -1.30929 | -1.28068 | 3.22753  |
| H | -0.9507  | -2.08367 | 3.85515  |
| N | 2.63712  | 0.69684  | -4.05265 |
| C | 3.3743   | 0.79401  | -5.35832 |
| H | 3.8906   | 1.75571  | -5.3864  |
| H | 2.65133  | 0.70018  | -6.16702 |
| H | 4.08973  | -0.03147 | -5.39569 |
| C | 3.34107  | 0.36616  | -2.93622 |
| H | 4.41442  | 0.24662  | -3.07292 |

|   |          |          |          |
|---|----------|----------|----------|
| C | 2.68748  | 0.21392  | -1.72923 |
| H | 3.25069  | -0.08431 | -0.85404 |
| C | 1.29745  | 0.4353   | -1.62682 |
| C | 0.60999  | 0.8261   | -2.79702 |
| H | -0.45106 | 1.05672  | -2.81117 |
| C | 1.29729  | 0.92651  | -3.98889 |
| H | 0.79325  | 1.1702   | -4.91367 |
| C | 0.65298  | 0.19675  | -0.33489 |
| H | 1.30657  | -0.18966 | 0.44461  |
| C | -0.64376 | 0.4299   | -0.05131 |
| H | -1.30244 | 0.89861  | -0.77578 |
| O | -5.77886 | 2.42399  | -1.68165 |
| O | -2.17839 | 5.24215  | 3.63616  |
| O | -0.1524  | -2.94352 | 6.71409  |
| O | -4.19696 | -5.51511 | 1.54278  |
| N | -4.5623  | 3.39233  | 0.06943  |
| N | -3.35209 | 4.32866  | 1.82219  |
| N | -1.40929 | -3.85857 | 4.93485  |
| N | -2.77828 | -4.69621 | 3.23659  |
| C | -5.48382 | 3.49686  | -0.86929 |
| C | -6.25772 | 4.66377  | -1.10622 |
| H | -6.98969 | 4.65448  | -1.89992 |
| C | -6.03398 | 5.7552   | -0.30662 |
| H | -6.60086 | 6.6684   | -0.44544 |
| C | -5.04466 | 5.69438  | 0.71283  |
| C | -4.7452  | 6.76212  | 1.60118  |
| H | -5.28206 | 7.69922  | 1.51078  |
| C | -3.77997 | 6.59757  | 2.56113  |
| H | -3.50769 | 7.37163  | 3.26277  |
| C | -3.10921 | 5.34818  | 2.62478  |
| C | -4.31667 | 4.47851  | 0.86122  |
| C | -1.14618 | 4.2723   | 3.64226  |
| C | -0.93473 | 3.60243  | 4.85199  |
| H | -1.59322 | 3.806    | 5.68664  |
| C | 0.14685  | 2.73905  | 4.9613   |
| C | 1.00769  | 2.53388  | 3.86853  |
| C | 0.77419  | 3.19027  | 2.66517  |
| H | 1.44801  | 3.05156  | 1.82709  |
| C | -0.31231 | 4.06769  | 2.54642  |
| H | -0.48726 | 4.60473  | 1.62427  |
| C | 0.57985  | 1.9828   | 6.2216   |
| H | -0.08961 | 2.14015  | 7.06873  |
| C | 2.01889  | 2.45135  | 6.49544  |
| C | 2.49613  | 3.01835  | 7.66986  |
| H | 1.83692  | 3.17584  | 8.51611  |
| C | 3.8473   | 3.38803  | 7.75046  |
| H | 4.22743  | 3.83273  | 8.66228  |
| C | 4.7007   | 3.18844  | 6.66512  |
| H | 5.74208  | 3.47887  | 6.73599  |
| C | 4.21618  | 2.61623  | 5.47943  |
| H | 4.87339  | 2.46087  | 4.63057  |

|   |          |          |          |
|---|----------|----------|----------|
| C | 2.87784  | 2.25265  | 5.4037   |
| C | 2.1843   | 1.61204  | 4.19345  |
| H | 2.8705   | 1.45409  | 3.36202  |
| C | 1.57809  | 0.31291  | 4.72807  |
| C | 1.85893  | -0.97127 | 4.28076  |
| H | 2.53219  | -1.1283  | 3.44664  |
| C | 1.2762   | -2.07199 | 4.92274  |
| H | 1.52242  | -3.07787 | 4.61618  |
| C | 0.40038  | -1.86413 | 5.97879  |
| C | 0.10391  | -0.57441 | 6.43628  |
| H | -0.5606  | -0.45474 | 7.28223  |
| C | 0.70891  | 0.51017  | 5.81657  |
| C | -1.03326 | -3.8706  | 6.20069  |
| C | -1.49149 | -4.80705 | 7.16858  |
| H | -1.11174 | -4.73803 | 8.17685  |
| C | -2.40478 | -5.74678 | 6.77367  |
| H | -2.78691 | -6.47927 | 7.47522  |
| C | -2.87366 | -5.75146 | 5.43222  |
| C | -3.84403 | -6.66347 | 4.9368   |
| H | -4.25409 | -7.41715 | 5.59908  |
| C | -4.2552  | -6.57828 | 3.63311  |
| H | -4.99089 | -7.23919 | 3.20006  |
| C | -3.68883 | -5.55842 | 2.82245  |
| C | -2.35101 | -4.77425 | 4.53627  |
| C | -3.69313 | -4.68751 | 0.51019  |
| C | -4.65926 | -4.04476 | -0.27568 |
| H | -5.70591 | -4.18732 | -0.03943 |
| C | -4.24387 | -3.26197 | -1.34237 |
| C | -2.87292 | -3.10551 | -1.61677 |
| C | -1.92779 | -3.7614  | -0.84091 |
| H | -0.87184 | -3.64989 | -1.05648 |
| C | -2.33689 | -4.56333 | 0.23274  |
| H | -1.60712 | -5.06558 | 0.84938  |
| C | -5.14195 | -2.48763 | -2.31451 |
| H | -6.20661 | -2.61624 | -2.11295 |
| C | -4.73356 | -2.95385 | -3.71887 |
| C | -5.57325 | -3.49283 | -4.68517 |
| H | -6.63122 | -3.623   | -4.48705 |
| C | -5.03756 | -3.86718 | -5.92616 |
| H | -5.68624 | -4.28576 | -6.6862  |
| C | -3.67719 | -3.70049 | -6.18593 |
| H | -3.2714  | -3.98895 | -7.14828 |
| C | -2.83137 | -3.15572 | -5.20871 |
| H | -1.77417 | -3.02217 | -5.41132 |
| C | -3.36488 | -2.78425 | -3.9809  |
| C | -2.59246 | -2.17998 | -2.80249 |
| H | -1.52732 | -2.06058 | -3.00696 |
| C | -4.6804  | -1.02941 | -2.21542 |
| C | -5.47775 | 0.06757  | -1.92045 |
| H | -6.54261 | -0.02486 | -1.74983 |
| C | -4.89061 | 1.33646  | -1.87517 |

|   |          |          |          |
|---|----------|----------|----------|
| C | -3.52772 | 1.51009  | -2.09684 |
| H | -3.09056 | 2.49659  | -2.04609 |
| C | -2.73333 | 0.39678  | -2.39728 |
| H | -1.67393 | 0.529    | -2.58525 |
| C | -3.30662 | -0.86686 | -2.46561 |
| O | -1.74386 | 2.11307  | -6.56955 |
| O | 0.47794  | -3.73417 | -3.41979 |
| O | 5.80929  | 0.49408  | 2.43718  |
| O | 2.61714  | 6.24375  | -0.02341 |
| N | -1.0266  | 0.13573  | -5.54061 |
| N | -0.30964 | -1.81155 | -4.48852 |
| N | 4.77689  | 2.43266  | 1.602    |
| N | 3.70097  | 4.34093  | 0.81021  |
| C | -1.76136 | 0.73029  | -6.45494 |
| C | -2.63782 | 0.05537  | -7.34931 |
| H | -3.19117 | 0.63058  | -8.07747 |
| C | -2.71429 | -1.31283 | -7.26478 |
| H | -3.35014 | -1.87571 | -7.93851 |
| C | -1.92789 | -2.00334 | -6.3005  |
| C | -1.91445 | -3.41423 | -6.14038 |
| H | -2.52821 | -4.03134 | -6.78666 |
| C | -1.10039 | -3.98697 | -5.19078 |
| H | -1.02522 | -5.05542 | -5.0505  |
| C | -0.31245 | -3.12519 | -4.38822 |
| C | -1.08779 | -1.22281 | -5.44903 |
| C | 1.82885  | -3.31884 | -3.21477 |
| C | 2.34752  | -3.49713 | -1.92796 |
| H | 1.71054  | -3.88015 | -1.14131 |
| C | 3.68977  | -3.21871 | -1.70375 |
| C | 4.5146   | -2.77206 | -2.75185 |
| C | 3.9774   | -2.57039 | -4.01802 |
| H | 4.60584  | -2.24127 | -4.83801 |
| C | 2.62194  | -2.84191 | -4.25445 |
| H | 2.20833  | -2.70646 | -5.24373 |
| C | 4.44429  | -3.40861 | -0.38526 |
| H | 3.80327  | -3.73855 | 0.43384  |
| C | 5.56672  | -4.40608 | -0.71227 |
| C | 5.80209  | -5.61756 | -0.07568 |
| H | 5.16806  | -5.94471 | 0.74072  |
| C | 6.87521  | -6.41493 | -0.49946 |
| H | 7.06891  | -7.3603  | -0.00724 |
| C | 7.69378  | -5.99547 | -1.54787 |
| H | 8.52162  | -6.61588 | -1.86921 |
| C | 7.45316  | -4.77166 | -2.18917 |
| H | 8.09261  | -4.44785 | -3.00264 |
| C | 6.39038  | -3.98376 | -1.76736 |
| C | 5.98238  | -2.61872 | -2.34207 |
| H | 6.62524  | -2.2922  | -3.16146 |
| C | 5.99159  | -1.66072 | -1.14881 |
| C | 6.76039  | -0.50981 | -1.01457 |
| H | 7.43755  | -0.20471 | -1.80467 |

|   |          |          |          |
|---|----------|----------|----------|
| C | 6.68662  | 0.24151  | 0.16618  |
| H | 7.29969  | 1.12316  | 0.29735  |
| C | 5.84084  | -0.1759  | 1.18805  |
| C | 5.06494  | -1.33305 | 1.06736  |
| H | 4.44265  | -1.64002 | 1.89799  |
| C | 5.15264  | -2.07876 | -0.10028 |
| C | 5.41492  | 1.80747  | 2.57226  |
| C | 5.73419  | 2.38684  | 3.83096  |
| H | 6.26646  | 1.79095  | 4.55713  |
| C | 5.35847  | 3.68412  | 4.05723  |
| H | 5.58852  | 4.17263  | 4.99686  |
| C | 4.66274  | 4.40142  | 3.04568  |
| C | 4.22224  | 5.74486  | 3.18006  |
| H | 4.42822  | 6.28361  | 4.09775  |
| C | 3.55619  | 6.35378  | 2.14566  |
| H | 3.21396  | 7.37698  | 2.18592  |
| C | 3.32169  | 5.59562  | 0.97097  |
| C | 4.38666  | 3.72623  | 1.82125  |
| C | 2.75604  | 5.92727  | -1.39899 |
| C | 1.60772  | 6.09614  | -2.18212 |
| H | 0.68602  | 6.40091  | -1.70331 |
| C | 1.69686  | 5.90844  | -3.55514 |
| C | 2.9195   | 5.54266  | -4.14512 |
| C | 4.05107  | 5.37302  | -3.35686 |
| H | 5.00446  | 5.12413  | -3.80997 |
| C | 3.97316  | 5.5653   | -1.97066 |
| H | 4.85359  | 5.45123  | -1.35515 |
| C | 0.56914  | 6.10024  | -4.57782 |
| H | -0.38017 | 6.38626  | -4.12229 |
| C | 1.09819  | 7.14063  | -5.57565 |
| C | 0.48826  | 8.34187  | -5.91251 |
| H | -0.45334 | 8.62917  | -5.45818 |
| C | 1.10568  | 9.18283  | -6.8495  |
| H | 0.63832  | 10.12258 | -7.1179  |
| C | 2.31707  | 8.81555  | -7.43526 |
| H | 2.78869  | 9.47021  | -8.15815 |
| C | 2.93059  | 7.60176  | -7.09301 |
| H | 3.87241  | 7.31919  | -7.54979 |
| C | 2.31739  | 6.77065  | -6.1646  |
| C | 2.84029  | 5.41482  | -5.66796 |
| H | 3.78947  | 5.13008  | -6.12539 |
| C | 0.48946  | 4.78902  | -5.36626 |
| C | -0.64784 | 4.01431  | -5.55847 |
| H | -1.60673 | 4.30992  | -5.15465 |
| C | -0.54068 | 2.84657  | -6.31774 |
| C | 0.66857  | 2.45107  | -6.87813 |
| H | 0.72683  | 1.54795  | -7.47018 |
| C | 1.80488  | 3.24709  | -6.69144 |
| H | 2.74355  | 2.95747  | -7.14962 |
| C | 1.7153   | 4.41314  | -5.94123 |

**(T, T)-H<sub>2</sub>-G1**

|   |          |         |          |
|---|----------|---------|----------|
| N | 4.116    | 23.0276 | 14.007   |
| C | 4.9606   | 21.8535 | 14.2378  |
| H | 5.7545   | 21.9178 | 13.6998  |
| H | 4.4761   | 21.0603 | 14.0002  |
| H | 5.2046   | 21.8119 | 15.1667  |
| C | 4.6478   | 24.1315 | 13.4508  |
| H | 5.5461   | 24.1456 | 13.2072  |
| C | 3.8589   | 25.2373 | 13.2462  |
| H | 4.2301   | 25.9909 | 12.8473  |
| C | 2.5108   | 25.2599 | 13.6229  |
| C | 2.0082   | 24.0897 | 14.2045  |
| H | 1.1186   | 24.0534 | 14.4738  |
| C | 2.8155   | 23.0062 | 14.3767  |
| H | 2.4644   | 22.2326 | 14.758   |
| N | -2.45032 | 29.9384 | 13.02567 |
| C | -3.29492 | 31.1126 | 12.79487 |
| H | -4.08882 | 31.0483 | 13.33287 |
| H | -2.81042 | 31.9058 | 13.03247 |
| H | -3.53892 | 31.1541 | 11.86597 |
| C | -2.98212 | 28.8345 | 13.58187 |
| H | -3.88042 | 28.8204 | 13.82547 |
| C | -2.19322 | 27.7287 | 13.78647 |
| H | -2.56442 | 26.9752 | 14.18537 |
| C | -0.84512 | 27.7062 | 13.40977 |
| C | -0.34252 | 28.8763 | 12.82817 |
| H | 0.54708  | 28.9127 | 12.55887 |
| C | -1.14982 | 29.9599 | 12.65597 |
| H | -0.79872 | 30.7335 | 12.27467 |
| C | -0.03212 | 26.5261 | 13.64467 |
| H | -0.45872 | 25.7758 | 13.99057 |
| C | 1.28558  | 26.4314 | 13.40247 |
| H | 1.72838  | 27.1868 | 13.08927 |
| O | 7.9532   | 22.34   | 10.6813  |
| O | 7.919    | 24.7318 | 17.1911  |
| O | -0.7917  | 25.4702 | 18.3857  |
| O | -0.0984  | 20.168  | 13.951   |
| N | 7.8919   | 23.0626 | 12.866   |
| N | 7.8814   | 23.8803 | 15.0189  |
| N | -0.5263  | 23.7313 | 16.8896  |
| N | -0.3028  | 21.949  | 15.4257  |
| C | 8.5703   | 22.5693 | 11.8727  |
| C | 9.9396   | 22.2611 | 11.87    |
| H | 10.3653  | 21.9585 | 11.0989  |
| C | 10.6135  | 22.4198 | 13.0218  |
| H | 11.5168  | 22.2    | 13.0692  |
| C | 9.944    | 22.9199 | 14.1561  |
| C | 10.5487  | 23.0941 | 15.4178  |
| H | 11.4259  | 22.8187 | 15.5591  |
| C | 9.8437   | 23.6683 | 16.4249  |

|   |         |         |         |
|---|---------|---------|---------|
| H | 10.2149 | 23.782  | 17.2695 |
| C | 8.5319  | 24.0805 | 16.1415 |
| C | 8.5899  | 23.2708 | 14.0192 |
| C | 6.8604  | 25.6129 | 16.9946 |
| C | 5.939   | 25.6653 | 18.0585 |
| H | 5.9801  | 25.0493 | 18.7526 |
| C | 4.979   | 26.647  | 18.0474 |
| C | 4.8983  | 27.5585 | 16.9878 |
| C | 5.8046  | 27.4671 | 15.9402 |
| H | 5.7467  | 28.0641 | 15.2262 |
| C | 6.792   | 26.5    | 15.9469 |
| H | 7.4042  | 26.4522 | 15.2479 |
| C | 3.9135  | 26.8758 | 19.1196 |
| H | 3.97    | 26.2406 | 19.865  |
| C | 4.0968  | 28.3368 | 19.5513 |
| C | 4.3383  | 28.7856 | 20.8317 |
| H | 4.4009  | 28.1808 | 21.5348 |
| C | 4.488   | 30.1481 | 21.0642 |
| H | 4.6719  | 30.4521 | 21.9245 |
| C | 4.3645  | 31.0469 | 20.0357 |
| H | 4.451   | 31.9581 | 20.2033 |
| C | 4.1088  | 30.5959 | 18.7318 |
| H | 4.0123  | 31.2037 | 18.0354 |
| C | 4.0004  | 29.2396 | 18.4947 |
| C | 3.7651  | 28.5634 | 17.144  |
| H | 3.7099  | 29.1984 | 16.4008 |
| C | 2.5056  | 27.7393 | 17.3201 |
| C | 1.3543  | 27.8128 | 16.5624 |
| H | 1.3098  | 28.3952 | 15.8379 |
| C | 0.2706  | 27.0202 | 16.8825 |
| H | -0.5139 | 27.0818 | 16.3873 |
| C | 0.3556  | 26.1434 | 17.9334 |
| C | 1.5067  | 26.0188 | 18.7088 |
| H | 1.5495  | 25.4129 | 19.413  |
| C | 2.5847  | 26.8327 | 18.3954 |
| C | -1.1932 | 24.296  | 17.8557 |
| C | -2.3471 | 23.7693 | 18.479  |
| H | -2.8075 | 24.2596 | 19.1207 |
| C | -2.7624 | 22.5452 | 18.1223 |
| H | -3.4953 | 22.1566 | 18.5415 |
| C | -2.0737 | 21.8554 | 17.0998 |
| C | -2.4003 | 20.5612 | 16.6552 |
| H | -3.0817 | 20.0888 | 17.0747 |
| C | -1.7204 | 19.9957 | 15.6092 |
| H | -1.9176 | 19.1418 | 15.302  |
| C | -0.706  | 20.7797 | 15.0257 |
| C | -0.9779 | 22.5034 | 16.4728 |
| C | 0.4924  | 20.9004 | 12.9301 |
| C | 1.6074  | 20.3168 | 12.345  |
| H | 1.9552  | 19.5217 | 12.6849 |
| C | 2.194   | 20.9279 | 11.2535 |



|   |          |         |          |
|---|----------|---------|----------|
| C | 1.6815   | 22.1248 | 10.7596  |
| C | 0.5494   | 22.6898 | 11.3393  |
| H | 0.1927   | 23.4754 | 10.9934  |
| C | -0.0456  | 22.0733 | 12.4364  |
| H | -0.799   | 22.4469 | 12.8337  |
| C | 3.3891   | 20.4123 | 10.4608  |
| H | 3.746    | 19.5678 | 10.8094  |
| C | 2.8751   | 20.2975 | 9.015    |
| C | 2.887    | 19.1491 | 8.2329   |
| H | 3.2164   | 18.3467 | 8.5658   |
| C | 2.3877   | 19.2395 | 6.9257   |
| H | 2.3704   | 18.4824 | 6.3871   |
| C | 1.9255   | 20.4253 | 6.4304   |
| H | 1.6168   | 20.466  | 5.5535   |
| C | 1.9107   | 21.5666 | 7.2188   |
| H | 1.5933   | 22.3682 | 6.8743   |
| C | 2.374    | 21.5029 | 8.5203   |
| C | 2.4293   | 22.6298 | 9.5392   |
| H | 2.068    | 23.4727 | 9.1936   |
| C | 4.4117   | 21.5208 | 10.4321  |
| C | 5.7479   | 21.4152 | 10.7412  |
| H | 6.0992   | 20.6207 | 11.0692  |
| C | 6.5513   | 22.5191 | 10.5512  |
| C | 6.0785   | 23.7164 | 10.1192  |
| H | 6.6491   | 24.4441 | 10.0326  |
| C | 4.7357   | 23.8382 | 9.8099   |
| H | 4.3946   | 24.6531 | 9.5157   |
| C | 3.8986   | 22.7384 | 9.942    |
| O | -6.28752 | 30.6261 | 16.35137 |
| O | -6.25332 | 28.2343 | 9.84157  |
| O | 2.45738  | 27.4959 | 8.64697  |
| O | 1.76408  | 32.798  | 13.08167 |
| N | -6.22622 | 29.9034 | 14.16667 |
| N | -6.21572 | 29.0858 | 12.01377 |
| N | 2.19198  | 29.2348 | 10.14307 |
| N | 1.96848  | 31.0171 | 11.60697 |
| C | -6.90462 | 30.3968 | 15.15997 |
| C | -8.27392 | 30.705  | 15.16267 |
| H | -8.69962 | 31.0076 | 15.93377 |
| C | -8.94782 | 30.5463 | 14.01087 |
| H | -9.85112 | 30.7661 | 13.96347 |
| C | -8.27832 | 30.0462 | 12.87657 |
| C | -8.88302 | 29.872  | 11.61487 |
| H | -9.76022 | 30.1474 | 11.47357 |
| C | -8.17802 | 29.2978 | 10.60777 |
| H | -8.54922 | 29.1841 | 9.76317  |
| C | -6.86622 | 28.8856 | 10.89117 |
| C | -6.92422 | 29.6953 | 13.01347 |
| C | -5.19472 | 27.3532 | 10.03807 |
| C | -4.27332 | 27.3008 | 8.97417  |
| H | -4.31442 | 27.9168 | 8.28007  |

|   |          |         |          |
|---|----------|---------|----------|
| C | -3.31332 | 26.319  | 8.98527  |
| C | -3.23262 | 25.4075 | 10.04487 |
| C | -4.13892 | 25.499  | 11.09247 |
| H | -4.08102 | 24.902  | 11.80647 |
| C | -5.12632 | 26.4661 | 11.08577 |
| H | -5.73852 | 26.5139 | 11.78477 |
| C | -2.24782 | 26.0903 | 7.91307  |
| H | -2.30432 | 26.7255 | 7.16767  |
| C | -2.43112 | 24.6293 | 7.48137  |
| C | -2.67262 | 24.1804 | 6.20097  |
| H | -2.73522 | 24.7853 | 5.49787  |
| C | -2.82232 | 22.8179 | 5.96847  |
| H | -3.00622 | 22.514  | 5.10817  |
| C | -2.69882 | 21.9192 | 6.99697  |
| H | -2.78532 | 21.008  | 6.82937  |
| C | -2.44312 | 22.3702 | 8.30087  |
| H | -2.34662 | 21.7623 | 8.99727  |
| C | -2.33472 | 23.7265 | 8.53797  |
| C | -2.09942 | 24.4027 | 9.88867  |
| H | -2.04422 | 23.7677 | 10.63187 |
| C | -0.83992 | 25.2268 | 9.71257  |
| C | 0.31138  | 25.1533 | 10.47027 |
| H | 0.35588  | 24.5709 | 11.19477 |
| C | 1.39508  | 25.9459 | 10.15017 |
| H | 2.17958  | 25.8843 | 10.64537 |
| C | 1.31008  | 26.8227 | 9.09927  |
| C | 0.15898  | 26.9472 | 8.32387  |
| H | 0.11618  | 27.5532 | 7.61967  |
| C | -0.91902 | 26.1334 | 8.63727  |
| C | 2.85888  | 28.6701 | 9.17697  |
| C | 4.01278  | 29.1968 | 8.55367  |
| H | 4.47318  | 28.7065 | 7.91197  |
| C | 4.42808  | 30.4209 | 8.91037  |
| H | 5.16098  | 30.8095 | 8.49117  |
| C | 3.73938  | 31.1107 | 9.93287  |
| C | 4.06598  | 32.4048 | 10.37747 |
| H | 4.74738  | 32.8773 | 9.95797  |
| C | 3.38608  | 32.9703 | 11.42347 |
| H | 3.58328  | 33.8243 | 11.73067 |
| C | 2.37168  | 32.1864 | 12.00697 |
| C | 2.64358  | 30.4627 | 10.55987 |
| C | 1.17328  | 32.0656 | 14.10257 |
| C | 0.05828  | 32.6493 | 14.68767 |
| H | -0.28952 | 33.4444 | 14.34777 |
| C | -0.52832 | 32.0382 | 15.77917 |
| C | -0.01582 | 30.8413 | 16.27307 |
| C | 1.11628  | 30.2763 | 15.69337 |
| H | 1.47298  | 29.4907 | 16.03927 |
| C | 1.71128  | 30.8928 | 14.59627 |
| H | 2.46468  | 30.5191 | 14.19897 |
| C | -1.72342 | 32.5538 | 16.57187 |

|   |          |         |          |
|---|----------|---------|----------|
| H | -2.08032 | 33.3983 | 16.22327 |
| C | -1.20942 | 32.6686 | 18.01767 |
| C | -1.22132 | 33.817  | 18.79977 |
| H | -1.55072 | 34.6194 | 18.46687 |
| C | -0.72202 | 33.7266 | 20.10697 |
| H | -0.70472 | 34.4837 | 20.64557 |
| C | -0.25982 | 32.5408 | 20.60227 |
| H | 0.04888  | 32.5001 | 21.47917 |
| C | -0.24502 | 31.3994 | 19.81387 |
| H | 0.07238  | 30.5978 | 20.15837 |
| C | -0.70832 | 31.4632 | 18.51237 |
| C | -0.76362 | 30.3363 | 17.49347 |
| H | -0.40232 | 29.4934 | 17.83907 |
| C | -2.74602 | 31.4453 | 16.60057 |
| C | -4.08222 | 31.5509 | 16.29147 |
| H | -4.43352 | 32.3454 | 15.96347 |
| C | -4.88562 | 30.447  | 16.48147 |
| C | -4.41282 | 29.2497 | 16.91347 |
| H | -4.98342 | 28.5219 | 17.00007 |
| C | -3.07002 | 29.1279 | 17.22277 |
| H | -2.72892 | 28.313  | 17.51697 |
| C | -2.23292 | 30.2277 | 17.09067 |

## 6. References

- [1] Gaussian 09, Revision A.02; M. J. Frisch, G. W. Trucks, H. B. Schlegel, G. E. Scuseria, M. A. Robb, J. R. Cheeseman, G. Scalmani, V. Barone, B. Mennucci, G. A. Petersson, H. Nakatsuji, M. Caricato, X. Li, H. P. Hratchian, A. F. Izmaylov, J. Bloino, G. Zheng, J. L. Sonnenberg, M. Hada, M. Ehara, K. Toyota, R. Fukuda, J. Hasegawa, M. Ishida, T. Nakajima, Y. Honda, O. Kitao, H. Nakai, T. Vreven, J. A. Montgomery, Jr., J. E. Peralta, F. Ogliaro, M. Bearpark, J. J. Heyd, E. Brothers, K. N. Kudin, V. N. Staroverov, R. Kobayashi, J. Normand, K. Raghavachari, A. Rendell, J. C. Burant, S. S. Iyengar, J. Tomasi, M. Cossi, N. Rega, J. M. Millam, M. Klene, J. E. Knox, J. B. Cross, V. Bakken, C. Adamo, J. Jaramillo, R. Gomperts, R. E. Stratmann, O. Yazyev, A. J. Austin, R. Cammi, C. Pomelli, J. W. Ochterski, R. L. Martin, K. Morokuma, V. G. Zakrzewski, G. A. Voth, P. Salvador, J. J. Dannenberg, S. Dapprich, A. D. Daniels, O. Farkas, J. B. Foresman, J. V. Ortiz, J. Cioslowski, and D. J. Fox, Gaussian, Inc., Wallingford CT, 2009.
